# Supplementary material for: The Nucleosome Assembly Protein TSPYL2 Regulates the Expression of NMDA Receptor Subunits GluN2A and GluN2B
Source: PubMed Central journal article supplement — Sci Rep. 2014 Jan 13;4:3654. doi: 10.1038/srep03654 (PMC3888966; doi:10.1038/srep03654), 2014-01-13
Supplement: srep03654-s1.pdf [file srep03654-s1.pdf]

**The Nucleosome Assembly Protein TSPYL2 Regulates the Expression of NMDA Receptor Subunits GluN2A and GluN2B**

Ka Hing Tsang<sup>1,2</sup>, Suk King Lai<sup>3,4</sup>, Qi Li<sup>2,5</sup>, Wing Ho Yung<sup>6</sup>, Hang Liu<sup>1,2</sup>, Priscilla Hoi Shan Mak<sup>1,2</sup>, Cypress Chun Pong Ng<sup>1,2</sup>, Grainne McAlonan<sup>2,5,7</sup>, Ying Shing Chan<sup>3,4</sup>, Siu Yuen Chan<sup>1,2\*</sup>

<sup>1</sup>Department of Paediatrics and Adolescent Medicine, Li Ka Shing Faculty of Medicine, the University of Hong Kong, Hong Kong, China

<sup>2</sup>Centre for Reproduction, Development and Growth, Li Ka Shing Faculty of Medicine, the University of Hong Kong

<sup>3</sup>Department of Physiology, Li Ka Shing Faculty of Medicine, the University of Hong Kong, Hong Kong, China

<sup>4</sup>Research Centre of Heart, Brain, Hormone and Healthy Aging, Li Ka Shing Faculty of Medicine, the University of Hong Kong

<sup>5</sup>Department of Psychiatry, Li Ka Shing Faculty of Medicine, the University of Hong Kong, Hong Kong, China

<sup>6</sup>School of Biomedical Science, the Chinese University of Hong Kong, Hong Kong, China

<sup>7</sup>Department of Forensic and Neurodevelopmental Sciences, the Institute of Psychiatry, King's College London, United Kingdom

\* Corresponding author

**Supplementary Figure S1.** Absence of TSPYL2 protein in *Tsypyl2* mutant mice.

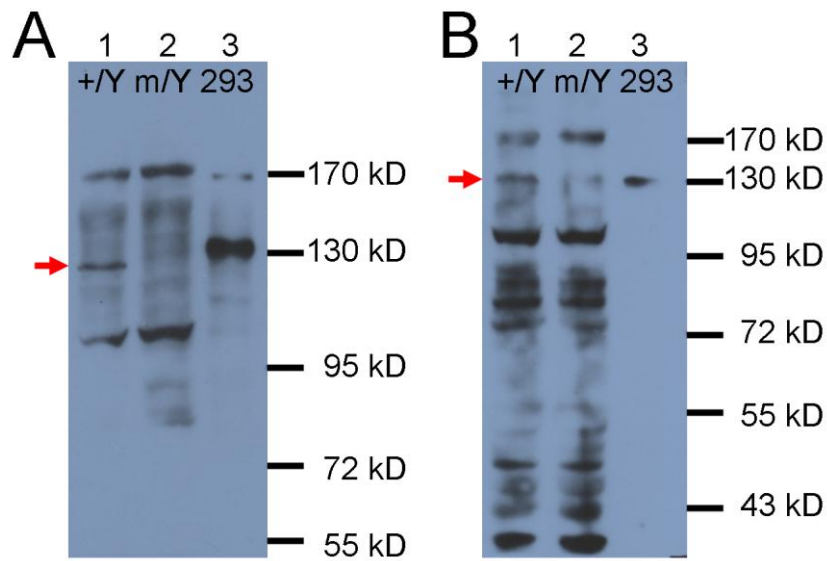

**Supplementary Figure S1.** Absence of TSPYL2 protein in *Tspyl2* mutant mice. Immunoblotting of hippocampal lysates collected from 2-month old mice separated by (A) 6% or (B) 7.5% SDS-PAGE. Polyclonal anti-CINAP antibodies (abcam, ab32808) were used. Arrows indicate full length TSPYL2. Lane 1: wild-type male; lane 2: *Tspyl2* mutant male; Lane 3: HA-TSPYL2 transfected HEK293 lysates as the positive control.
